# Supplementary material for: De-escalating chemotherapy for stage II colon cancer?
Source: PubMed Central journal article supplement — Ther Adv Gastroenterol. 2019 Aug 22;12:1756284819867553. doi: 10.1177/1756284819867553 (PMC6710694; doi:10.1177/1756284819867553), 2019-08-22
Supplement: Supplemental_Table1-PSM.pdf [file Supplemental_Table1-PSM.pdf]

**Supplemental Table1: Patient characteristics for subsets with and without chemotherapy after Propensity Score Matching (PSM).**

| Factors                       | Without Chemotherapy<br>N=13,806 | With Chemotherapy<br>N=13,806 | P     |
|-------------------------------|----------------------------------|-------------------------------|-------|
| Age                           |                                  |                               | 1.000 |
| ≤60                           | 6,518(47.21)                     | 6,518(47.21)                  |       |
| >60                           | 7,288(52.79)                     | 7,288(52.79)                  |       |
| Gender                        |                                  |                               | 0.990 |
| Female                        | 6,652(48.18)                     | 6,653(48.19)                  |       |
| Male                          | 7,154(51.82)                     | 7,153(51.81)                  |       |
| Marital status                |                                  |                               | 1.000 |
| Married                       | 9,076(65.74)                     | 9,075(65.73)                  |       |
| Unmarried                     | 1,861(13.48)                     | 1,861(13.48)                  |       |
| Divorced                      | 2,869(20.78)                     | 2,870(20.79)                  |       |
| Race                          |                                  |                               | 1.000 |
| White                         | 11,323(82.02)                    | 11,324(82.02)                 |       |
| Black                         | 1,345(9.74)                      | 1,344(9.73)                   |       |
| Other                         | 1,138(8.24)                      | 1,138(8.24)                   |       |
| Location <sup>a</sup>         |                                  |                               | 0.990 |
| Left colon                    | 7,605(55.08)                     | 7,606(55.09)                  |       |
| Right colon                   | 6,201(44.92)                     | 6,200(44.91)                  |       |
| Histology                     |                                  |                               | 0.995 |
| Adenocarcinoma                | 12,102(87.66)                    | 12,101(87.65)                 |       |
| Mucinous adenocarcinoma       | 1,658(12.01)                     | 1,658(12.01)                  |       |
| Signet ring cell carcinoma    | 46(0.33)                         | 47(0.34)                      |       |
| Differential grade            |                                  |                               | 1.000 |
| Grade I                       | 948(6.87)                        | 948(6.87)                     |       |
| Grade II                      | 10,544(76.37)                    | 10,543(76.37)                 |       |
| Grade III                     | 2,314(16.76)                     | 2,315(16.77)                  |       |
| T-classification <sup>b</sup> |                                  |                               | 0.988 |
| T3                            | 10,893(78.90)                    | 10,894(78.91)                 |       |
| T4                            | 2,913(21.10)                     | 2,912(21.09)                  |       |
| nLN                           |                                  |                               | 1.000 |
| 0                             | 319(2.31)                        | 319(2.31)                     |       |
| 0-3                           | 409(2.96)                        | 409(2.96)                     |       |
| 3-6                           | 1,156(8.37)                      | 1,157(8.38)                   |       |
| 6-12                          | 3,463(25.08)                     | 3,462(25.08)                  |       |
| ≥12                           | 8,459(61.27)                     | 8,459(61.27)                  |       |

CCSD=colon cancer specific death; nLN=number of lymphnodes;

<sup>a</sup> Left colon includes rectosigmoid junction, sigmoid colon, descending colon and splenic flexure.

Right colon includes transverse colon, hepatic flexure, ascending colon, cecum, and appendix.

<sup>b</sup> T classification according to 7<sup>th</sup> AJCC staging system.
