# Supplementary material for: De-escalating chemotherapy for stage II colon cancer?
Source: PubMed Central journal article supplement — Ther Adv Gastroenterol. 2019 Aug 22;12:1756284819867553. doi: 10.1177/1756284819867553 (PMC6710694; doi:10.1177/1756284819867553), 2019-08-22
Supplement: Supplemental_Table2-PSM.pdf [file Supplemental_Table2-PSM.pdf]

**Supplemental Table2: Analysis of CCSD and Non-CCSD after propensity score matching**

| Risk Factors                  | CCSD                |          |                       |          | Non-CCSD            |          |                       |          |
|-------------------------------|---------------------|----------|-----------------------|----------|---------------------|----------|-----------------------|----------|
|                               | univariate analyses |          | multivariate analyses |          | univariate analyses |          | multivariate analyses |          |
|                               | SHR (95%CI)         | <i>P</i> | SHR (95%CI)           | <i>P</i> | SHR (95%CI)         | <i>P</i> | SHR (95%CI)           | <i>P</i> |
| Age                           |                     |          |                       |          |                     |          |                       |          |
| ≤60                           | 1                   | -        | 1                     | -        | 1                   | -        | 1                     | -        |
| >60                           | 1.54(1.46-1.62)     | 0.000    | 1.39(1.31-1.47)       | 0.000    | 4.19(3.92-4.48)     | 0.00     | 4.14(3.87-4.44)       | 0.000    |
| Gender                        |                     |          |                       |          |                     |          |                       |          |
| Female                        | 1                   | -        | 1                     | -        | 1                   | -        | 1                     | -        |
| Male                          | 1.11(1.06-1.17)     | 0.000    | 1.18(1.11-1.24)       | 0.000    | 1.15(1.09-1.22)     | 0.000    | 1.34(1.27-1.42)       | 0.000    |
| Marital status                |                     |          |                       |          |                     |          |                       |          |
| Married                       | 1                   | -        | 1                     | -        | 1                   | -        | 1                     | -        |
| Unmarried                     | 1.29(1.20-1.40)     | 0.000    | 1.35(1.25-1.46)       | 0.000    | 0.89(0.82-0.98)     | 0.016    | 1.14(1.04-1.25)       | 0.005    |
| Divorced                      | 1.38(1.30-1.47)     | 0.000    | 1.29(1.21-1.38)       | 0.000    | 1.50(1.42-1.60)     | 0.000    | 1.34(1.25-1.42)       | 0.000    |
| Race                          |                     |          |                       |          |                     |          |                       |          |
| White                         | 1                   | -        | 1                     | -        | 1                   | -        | 1                     | -        |
| Black                         | 1.28(1.18-1.39)     | 0.000    | 1.36(1.25-1.48)       | 0.000    | 0.84(0.76-0.93)     | 0.001    | 0.95(0.86-1.06)       | 0.365    |
| Other                         | 0.77(0.69-0.85)     | 0.000    | 0.84(0.75-0.93)       | 0.001    | 0.69(0.62-0.77)     | 0.000    | 0.76(0.68-0.84)       | 0.000    |
| Location <sup>a</sup>         |                     |          |                       |          |                     |          |                       |          |
| Left colon                    | 1                   | -        | 1                     | -        | 1                   | -        | 1                     | -        |
| Right colon                   | 0.78(0.74-0.82)     | 0.000    | 0.80(0.76-0.85)       | 0.000    | 1.12(1.06-1.18)     | 0.000    | 1.12(1.06-1.19)       | 0.000    |
| Histology                     |                     |          |                       |          |                     |          |                       |          |
| Adenocarcinoma                | 1                   | -        | 1                     | -        | 1                   | -        | 1                     | -        |
| Mucinous adenocarcinoma       | 0.97(0.89-1.05)     | 0.415    | 1.00(0.92-1.09)       | 0.987    | 1.00(0.92-1.08)     | 0.953    | 0.96(0.88-1.04)       | 0.308    |
| Signet ring cell carcinoma    | 0.79(0.47-1.32)     | 0.363    | 0.94(0.55-1.59)       | 0.803    | 1.62(1.10-2.73)     | 0.014    | 1.43(0.99-2.07)       | 0.058    |
| Differential grade            |                     |          |                       |          |                     |          |                       |          |
| Grade I                       | 1                   | -        | 1                     | -        | 1                   | -        | 1                     | -        |
| Grade II                      | 0.97(0.88-1.07)     | 0.514    | 1.01(0.91-1.12)       | 0.860    | 0.98(0.88-1.08)     | 0.640    | 1.02(0.92-1.13)       | 0.667    |
| Grade III                     | 1.03(0.92-1.15)     | 0.654    | 1.14(1.02-1.29)       | 0.026    | 1.06(0.94-1.19)     | 0.345    | 1.02(0.91-1.25)       | 0.758    |
| T-classification <sup>b</sup> |                     |          |                       |          |                     |          |                       |          |
| T3                            | 1                   | -        | 1                     | -        | 1                   | -        | 1                     | -        |
| T4                            | 2.21(2.09-2.33)     | 0.000    | 2.14(2.03-2.27)       | 0.000    | 1.01(0.95-1.08)     | 0.732    | 0.86(0.81-0.92)       | 0.000    |
| nLN                           |                     |          |                       |          |                     |          |                       |          |
| 0                             | 1                   | -        | 1                     | -        | 1                   | -        | 1                     | -        |
| 0-3                           | 0.57(0.48-0.67)     | 0.000    | 0.66(0.56-0.78)       | 0.000    | 1.26(1.02-1.56)     | 0.033    | 1.25(1.00-1.55)       | 0.045    |
| 3-6                           | 0.52(0.45-0.60)     | 0.000    | 0.61(0.53-0.71)       | 0.000    | 1.20(1.00-1.45)     | 0.053    | 1.24(1.03-1.50)       | 0.026    |
| 6-12                          | 0.40(0.35-0.45)     | 0.000    | 0.48(0.42-0.54)       | 0.000    | 1.15(0.96-1.37)     | 0.122    | 1.22(1.02-1.47)       | 0.030    |

|                  |                 |       |                 |       |                 |       |                 |       |
|------------------|-----------------|-------|-----------------|-------|-----------------|-------|-----------------|-------|
| ≥12              | 0.26(0.23-0.29) | 0.000 | 0.32(0.28-0.36) | 0.000 | 0.89(0.75-1.06) | 0.185 | 1.05(0.88-1.26) | 0.572 |
| Chemotherapy     |                 |       |                 |       |                 |       |                 |       |
| Non-chemotherapy | 1               | -     | 1               | -     | 1               | -     | 1               | -     |
| Chemotherapy     | 1.13(1.07-1.19) | 0.000 | 1.16(1.10-1.22) | 0.000 | 0.62(0.59-0.66) | 0.000 | 0.60(0.57-0.63) | 0.000 |

CCSD=colon cancer specific death; nLN=number of lymphnodes;

<sup>a</sup> Left colon includes rectosigmoid junction, sigmoid colon, descending colon and splenic flexure.

Right colon includes transverse colon, hepatic flexure, ascending colon, cecum, and appendix.

<sup>b</sup> T classification according to 7<sup>th</sup> AJCC staging system.
